# Supplementary material
Source: PubMed Central journal article supplement (PMC8318071)

## A) Step 1: Enzymatic Oxidation by Tcz9

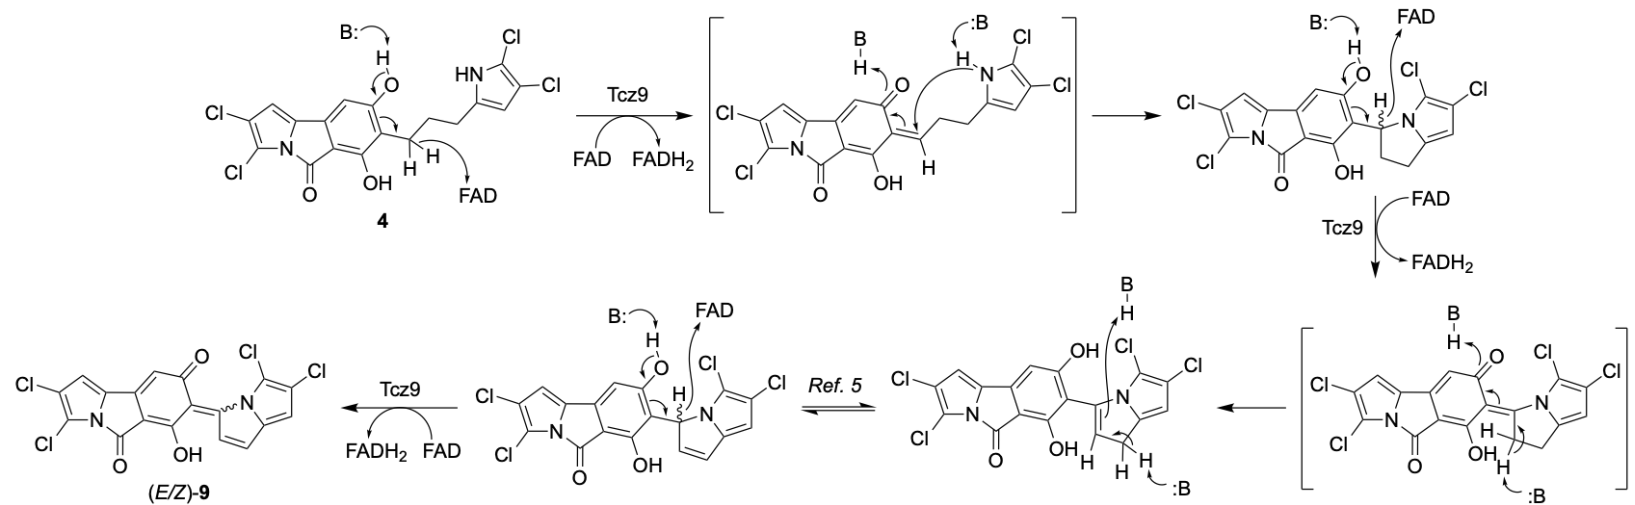

## B) Non-enzymatic conjugate addition by water; tautomerization to linear product

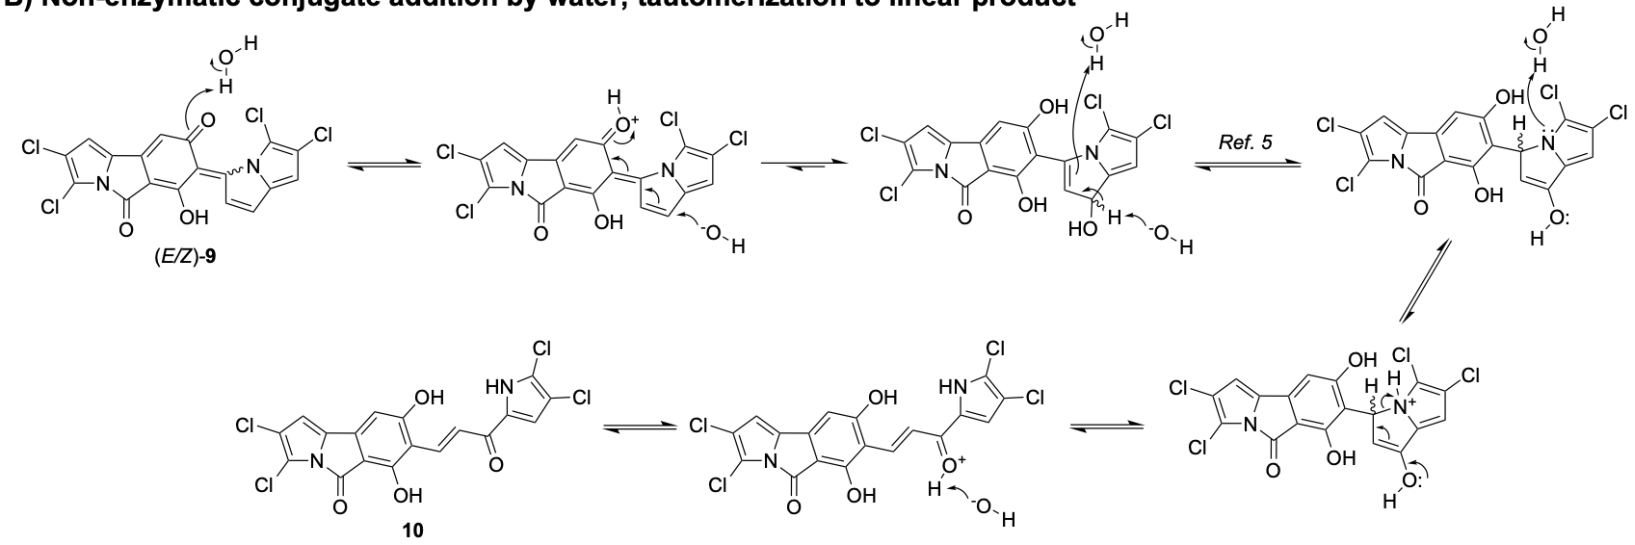

Supplement: NIHMS1702306-supplement-Scheme_S1.pdf [file NIHMS1702306-supplement-Scheme_S1.pdf]
